# Supplementary material for: Integrating cobalt phosphide and cobalt nitride-embedded nitrogen-rich nanocarbons: high-performance bifunctional electrocatalysts for oxygen reduction and evolution
Source: Royal Society of Chemistry journal article supplement (doi:10.1039/c6ta03820d), 2016-01-01
Supplement: c6ta03820d2.pdf [file c6ta03820d2.pdf]

## Supplementary Information

# Integrating Cobalt Phosphide and Cobalt Nitride-Embedded Nitrogen-Rich Nanocarbon: High-Performance Bifunctional Electrocatalysts for Oxygen Reduction and Evolution

Xing Zhong,<sup>a</sup> Yu Jiang,<sup>a</sup> Xianlang Chen,<sup>a</sup> Lei Wang,<sup>a</sup> Guilin Zhuang,<sup>a</sup> Xiaonian Li<sup>a</sup>  
and Jian-guo Wang<sup>\*a</sup>

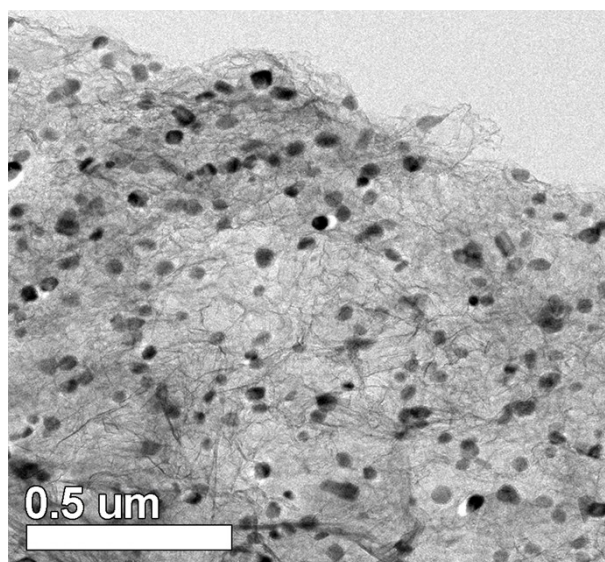

**Fig. S1** TEM image of CoNP@NC/NG-700, Scale bar is 0.5 μm.

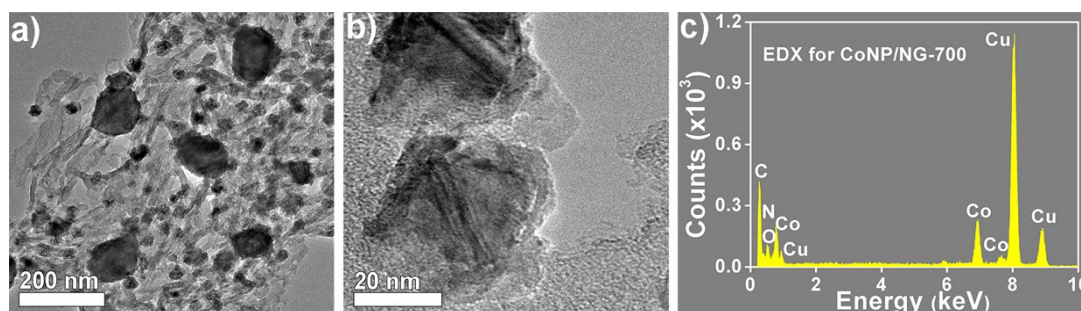

**Fig. S2** (a) TEM image of CoNP/NG-700, Scale bar is 200 nm; (b) TEM image of CoNP/NG-700, Scale bar is 20 nm (c) EDX spectrum of a CoNP nanoparticle in CoNP/NG-700.

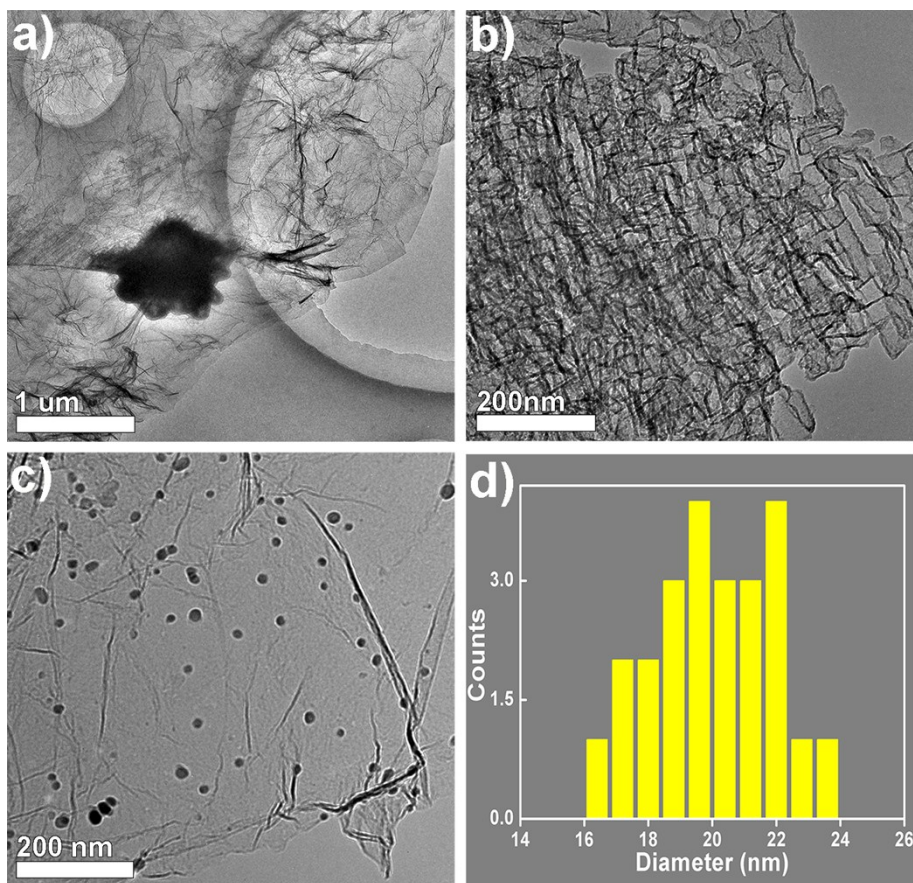

**Fig. S3** (a) TEM image of CoNP@NC/NG-600, Scale bar is 1 μm; (b) TEM image of CoNP@NC/NG-800, Scale bar is 200 nm; (c) TEM image of CoNP@NC/NG-800, Scale bar is 200 nm (d) Particle size distribution of CoNP@NC/NG-800.

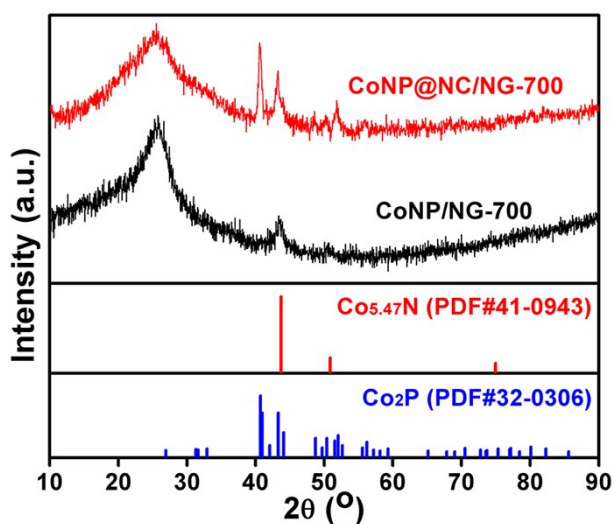

**Fig. S4** XRD result of CoNP@NC/NG-700 and CoNP/NG-700.

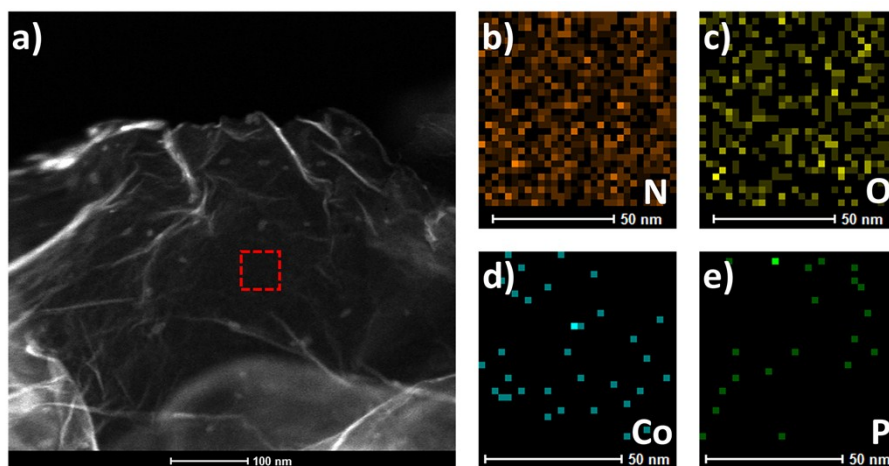

**Fig. S5** (a) The TEM image of CoNP@NC/NG-700 with a scale bar of 100 nm, (b-e) The blank space EDS elemental mapping images of N, O, Co, and P.

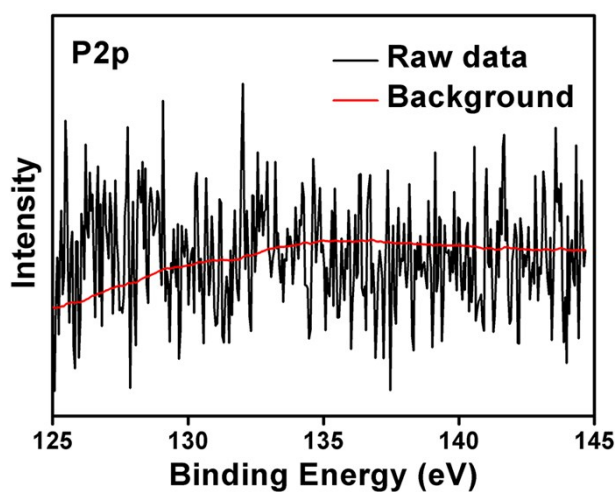

**Fig. S6** XPS high-resolution scan of the P2p region of CoNP/NG-700.

**Table S1.** The calculated species concentrations (atomic %) of different atoms in CoNP@NC/NG-600, CoNP@NC/NG-700, CoNP@NC/NG-800 and CoNP/NG-700 based on XPS results.

| Sample         | C%    | N%    | O%   | Co%  | P%   |
|----------------|-------|-------|------|------|------|
| CoNP@NC/NG-600 | 71.07 | 21.83 | 3.74 | 1.93 | 1.43 |
| CoNP@NC/NG-700 | 77.01 | 9.74  | 8.83 | 1.98 | 2.44 |
| CoNP@NC/NG-800 | 94.96 | 0.03  | 0.05 | 0.47 | 0.53 |
| CoNP/NG-700    | 88.68 | 6.86  | 3.43 | 0.9  | 0.13 |

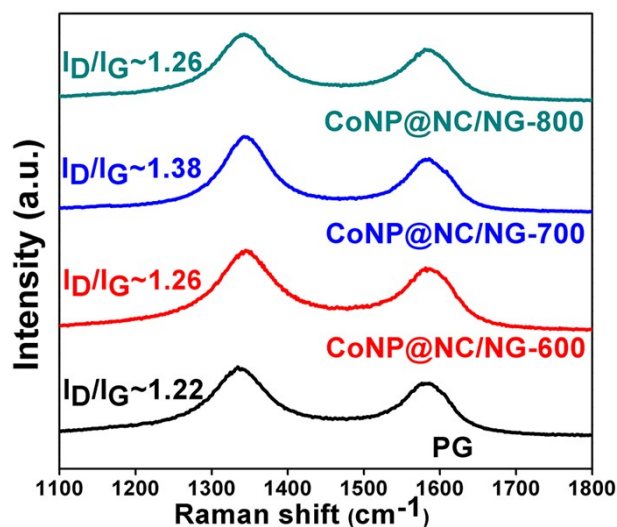

**Fig. S7** Raman spectra measurements for PG and CoNP@NC/NG samples annealed at various temperature.

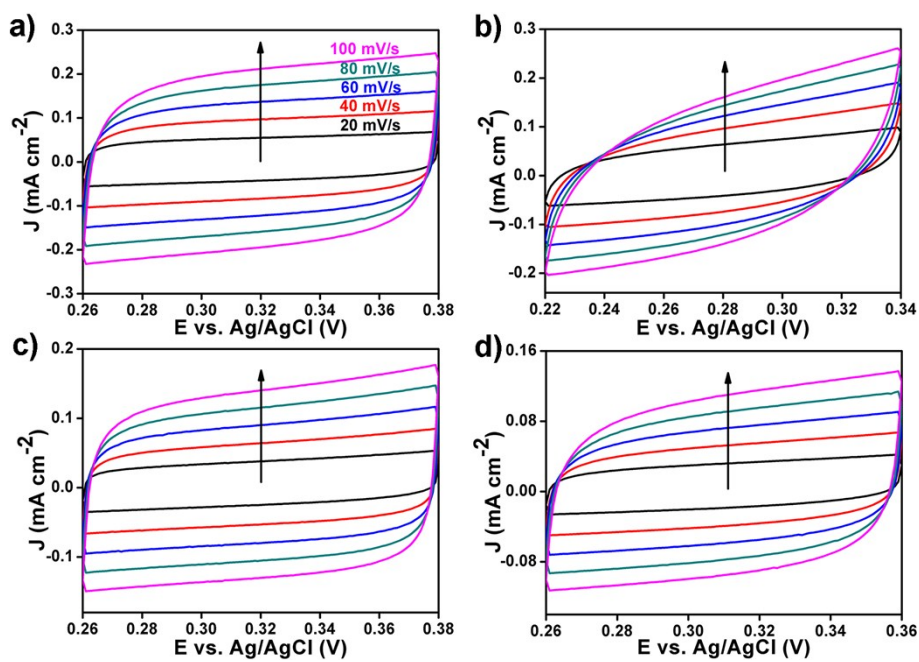

**Fig. S8** Cyclic voltammetry results at various scan rate for (a) CoNP@NC/NG-700, (b) CoNP@NC/NG-600, (c) CoNP@NC/NG-800 and (d) CoNP@NC/NG-700.



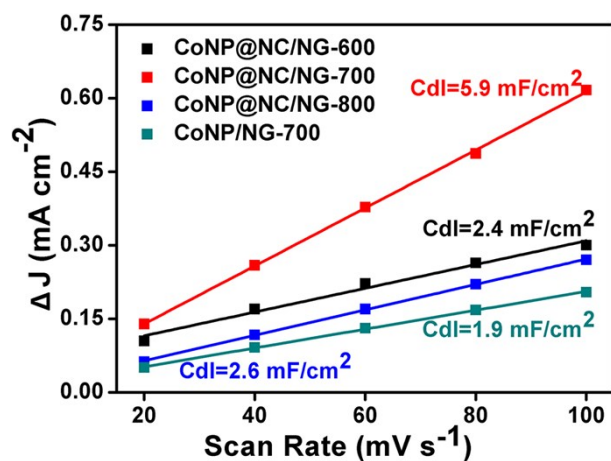

**Fig. S9** Charging current density differences plotted against scan rates of CoNP@NC/NG-600, CoNP@NC/NG-700, CoNP@NC/NG-800 and CoNP/NG-700.

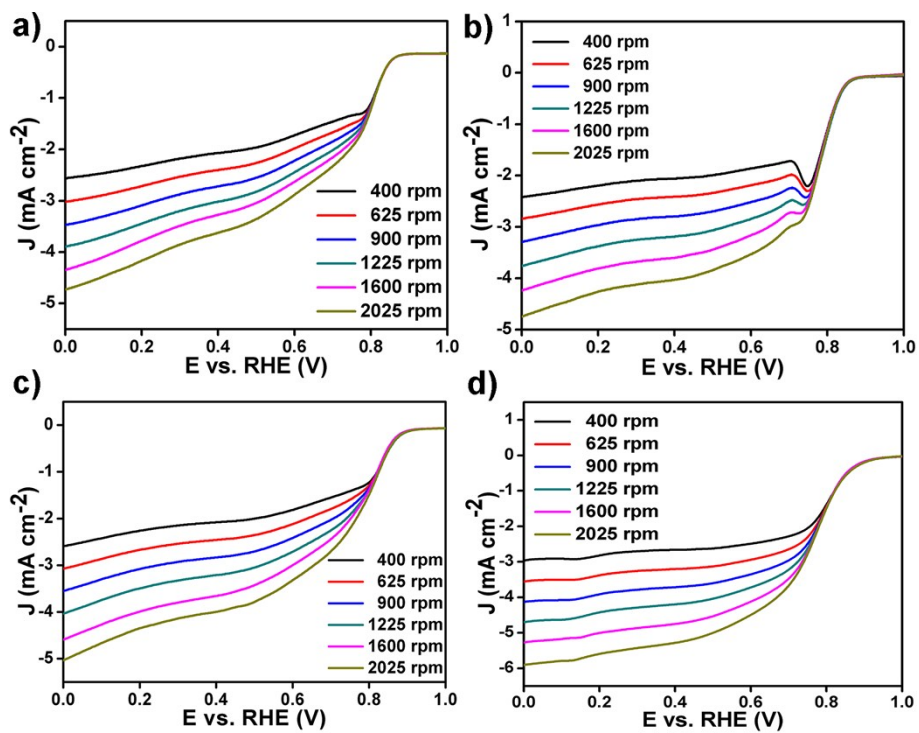

**Fig. S10** A series of linear sweep voltammograms recorded from 400 to 2025 rpm for (a) CoNP@NC/NG-600, (b) CoNP@NC/NG-800, (c) CoNP/NG-700 and (d) Commercial 20 wt. % Pt/C.

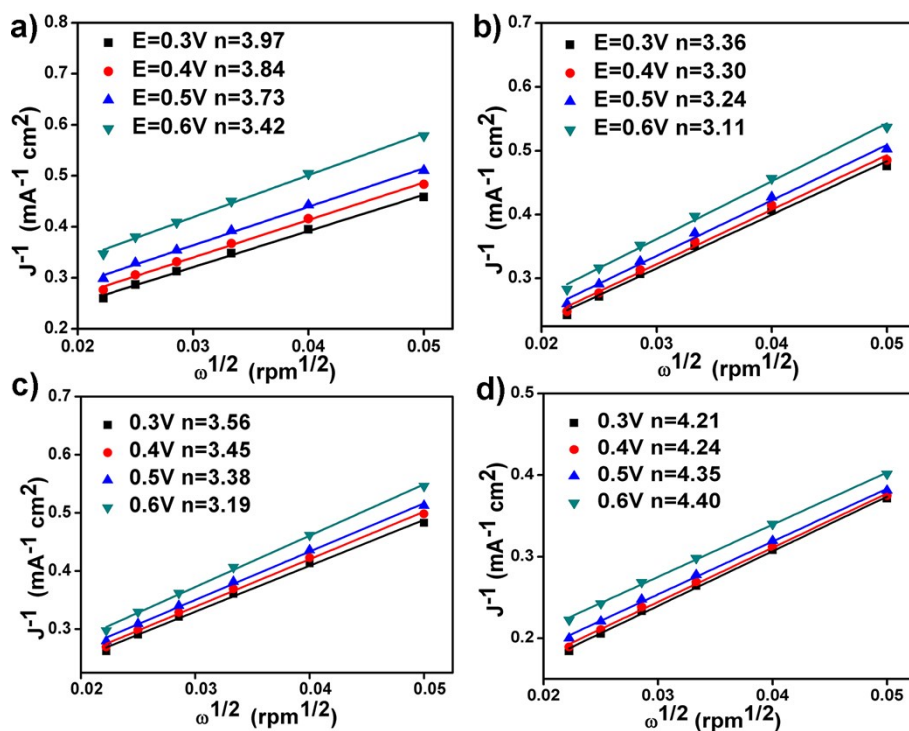

**Fig. S11** The calculation results of overall electron transfer numbers for (a) CoNP@NC/NG-600, (b) CoNP@NC/NG-800, (c) CoNP/NG-700 and (d) Commercial 20 wt. % Pt/C.

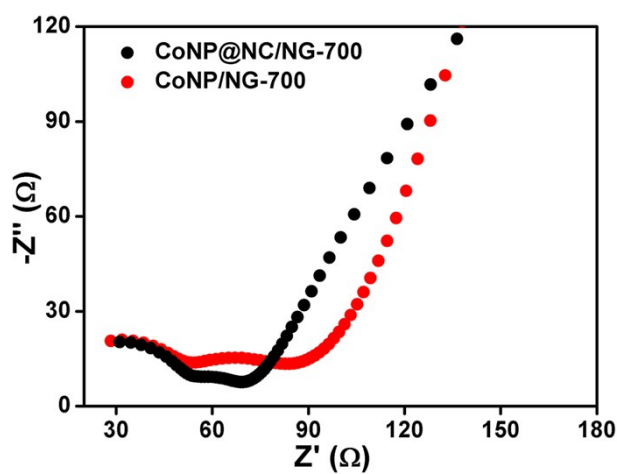

**Fig. S12** EIS spectrum (recorded at 1.2 V vs. RHE) of CoNP@NC/NG-700 and CoNP/NG-700.

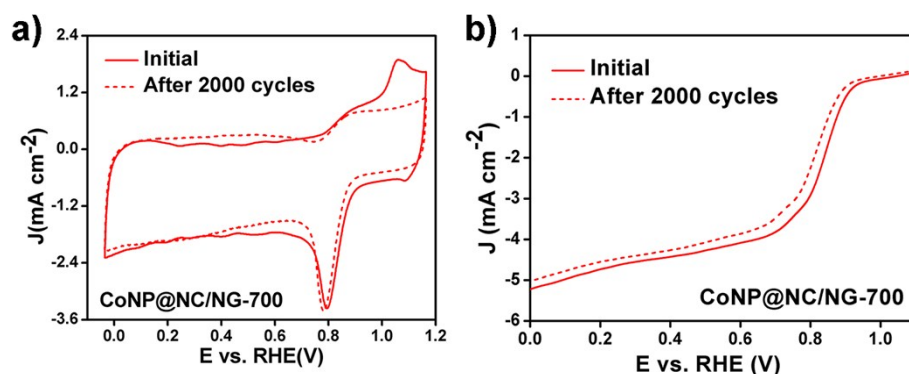

**Fig. S13** (a) CVs and (b) LSVs of CoNP@NC/NG-700 before and after 2000 scan cycles between -1.0 to 0.2 V vs. Ag/AgCl.

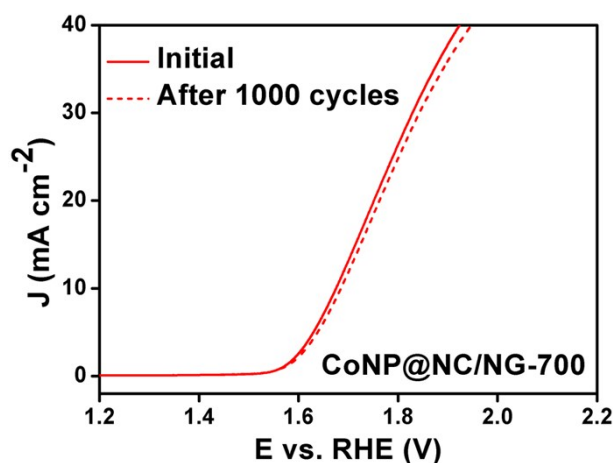

**Fig. S14** LSVs of CoNP@NC/NG-700 before and after 1000 scan cycles between 0 to 1.2 V vs. Ag/AgCl.

**Table S2:** Catalytic activity of CoNP@NC/NG-700 compared to previous Co based materials from some other literatures with high catalytic activity in alkaline condition.

| Materials                                              | $E_{\text{onset,ORR}}$ (V) | $E_{\text{ORR}}$ (V) at $-3 \text{ mA cm}^{-2}$ | $E_{\text{OER}}$ (V) at $10 \text{ mA cm}^{-2}$ | $\Delta E$ (V) $E_{\text{OER}} - E_{\text{ORR}}$ | ref                                                    |
|--------------------------------------------------------|----------------------------|-------------------------------------------------|-------------------------------------------------|--------------------------------------------------|--------------------------------------------------------|
| CoNP@NC/NG-700                                         | 0.93                       | 0.78                                            | 1.62                                            | 0.84                                             | This work                                              |
| 20% Pt/C                                               | 0.93                       | 0.74                                            | 1.95                                            | 1.21                                             | Used in this work (Alfa Aesar)                         |
| 20% Ru/C <sup>1</sup>                                  |                            | 0.61                                            | 1.62                                            | 1.01                                             | <i>J. Am. Chem. Soc.</i> 2010, 132, 13612-13614        |
| 20% Ir/C <sup>1</sup>                                  |                            | 0.69                                            | 1.61                                            | 0.92                                             |                                                        |
| Co/N-C-800 <sup>2</sup>                                | 0.83                       | 0.74                                            | 1.60                                            | 0.86                                             | <i>Nanoscale.</i> 2014, 6, 15080-15089                 |
| Co <sub>3</sub> O <sub>4</sub> /N-rmGO <sup>3</sup>    | 0.88                       | 0.85                                            | 1.54                                            | 0.69                                             | <i>Nat. Mater.</i> 2011, 10, 780-786                   |
| NiCo <sub>2</sub> S <sub>4</sub> @N/S-rGO <sup>4</sup> | 0.85                       | 0.72                                            | 1.70                                            | 0.98                                             | <i>ACS Appl. Mater. Interfaces.</i> 2013, 5, 5002-5008 |

|                                                                                  |      |      |      |      |                                                          |
|----------------------------------------------------------------------------------|------|------|------|------|----------------------------------------------------------|
| CNNT-ACN <sup>5</sup>                                                            | 0.93 | /    | 1.68 | /    | <i>ACS Appl. Mater. Interfaces.</i> 2015, 7, 11991-12000 |
| NiCo <sub>2</sub> O <sub>4</sub> /G <sup>6</sup>                                 | 0.89 | 0.56 | 1.69 | 1.13 | <i>J. Mater. Chem. A.</i> 2013, 1, 4754-4762             |
| Co <sub>3</sub> O <sub>4</sub> /2.7Co <sub>2</sub> MnO <sub>4</sub> <sup>7</sup> | 0.90 | 0.68 | 1.77 | 1.09 | <i>Nanoscale.</i> 2013, 5, 5312-5315                     |
| Ni <sub>0.6</sub> Co <sub>2.4</sub> O <sub>4</sub> <sup>8</sup>                  | 0.88 | 0.80 | 1.76 | 0.96 | <i>Chem. Commun.</i> 2015, 51, 9511-9514                 |
| N-graphene/CNT <sup>9</sup>                                                      | 0.88 | 0.69 | 1.65 | 0.96 | <i>Angew. Chem., Int. Ed.</i> 2014, 53, 6496-6500        |
| CCH-2/C <sup>10</sup>                                                            | 0.93 | 0.82 | 1.74 | 0.92 | <i>Chem. Commun.</i> 2014, 50, 15529-15532               |
| CoxSy@C-1000 <sup>11</sup>                                                       | 0.92 | /    | 1.70 | /    | <i>Nanoscale.</i> 2015, 7, 20674-20684                   |

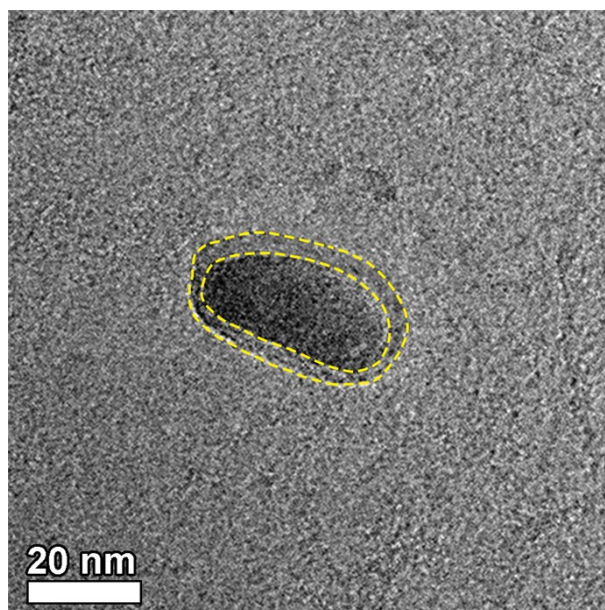

**Fig S15** TEM image of CoNP@NC/NG-700 after 1000 scan cycles between 0 to 1.2 V vs. Ag/AgCl.

## References

1. Y. Gorlin and T. F. Jaramillo, *J Am Chem Soc*, 2010, **132**, 13612-13614.
2. Y. H. Su, Y. H. Zhu, H. L. Jiang, J. H. Shen, X. L. Yang, W. J. Zou, J. D. Chen and C. Z. Li, *Nanoscale*, 2014, **6**, 15080-15089.
3. Y. Y. Liang, Y. G. Li, H. L. Wang, J. G. Zhou, J. Wang, T. Regier and H. J. Dai, *Nat Mater*, 2011, **10**, 780-786.
4. Q. Liu, J. T. Jin and J. Y. Zhang, *Acs Appl Mater Inter*, 2013, **5**, 5002-5008.
5. R. M. Yadav, J. J. Wu, R. Kochandra, L. L. Ma, C. S. Tiwary, L. H. Ge, G. L. Ye, R. Vajtai, J. Lou and P. M. Ajayan, *Acs Appl Mater Inter*, 2015, **7**, 11991-12000.



6. D. U. Lee, B. J. Kim and Z. W. Chen, *J Mater Chem A*, 2013, **1**, 4754-4762.
7. D. D. Wang, X. Chen, D. G. Evans and W. S. Yang, *Nanoscale*, 2013, **5**, 5312-5315.
8. T. N. Lambert, J. A. Vigil, S. E. White, D. J. Davis, S. J. Limmer, P. D. Burton, E. N. Coker, T. E. Beechem and M. T. Brumbach, *Chem Commun*, 2015, **51**, 9511-9514.
9. Z. H. Wen, S. Q. Ci, Y. Hou and J. H. Chen, *Angew Chem Int Edit*, 2014, **53**, 6496-6500.
10. Y. Wang, W. Ding, S. G. Chen, Y. Nie, K. Xiong and Z. D. Wei, *Chem Commun*, 2014, **50**, 15529-15532.
11. B. L. Chen, R. Li, G. P. Ma, X. L. Gou, Y. Q. Zhu and Y. D. Xia, *Nanoscale*, 2015, **7**, 20674-20684.
